# Supplementary material
Source: Elsevier journal article supplement (https://www.sciencedirect.com/science/article/pii/S2603647921000683)
Supplement: mmc1 [file S2603647921000683:mmc1.doc]

Diagrama de flujo del proceso de certificación de la norma de calidad Q-PEX.


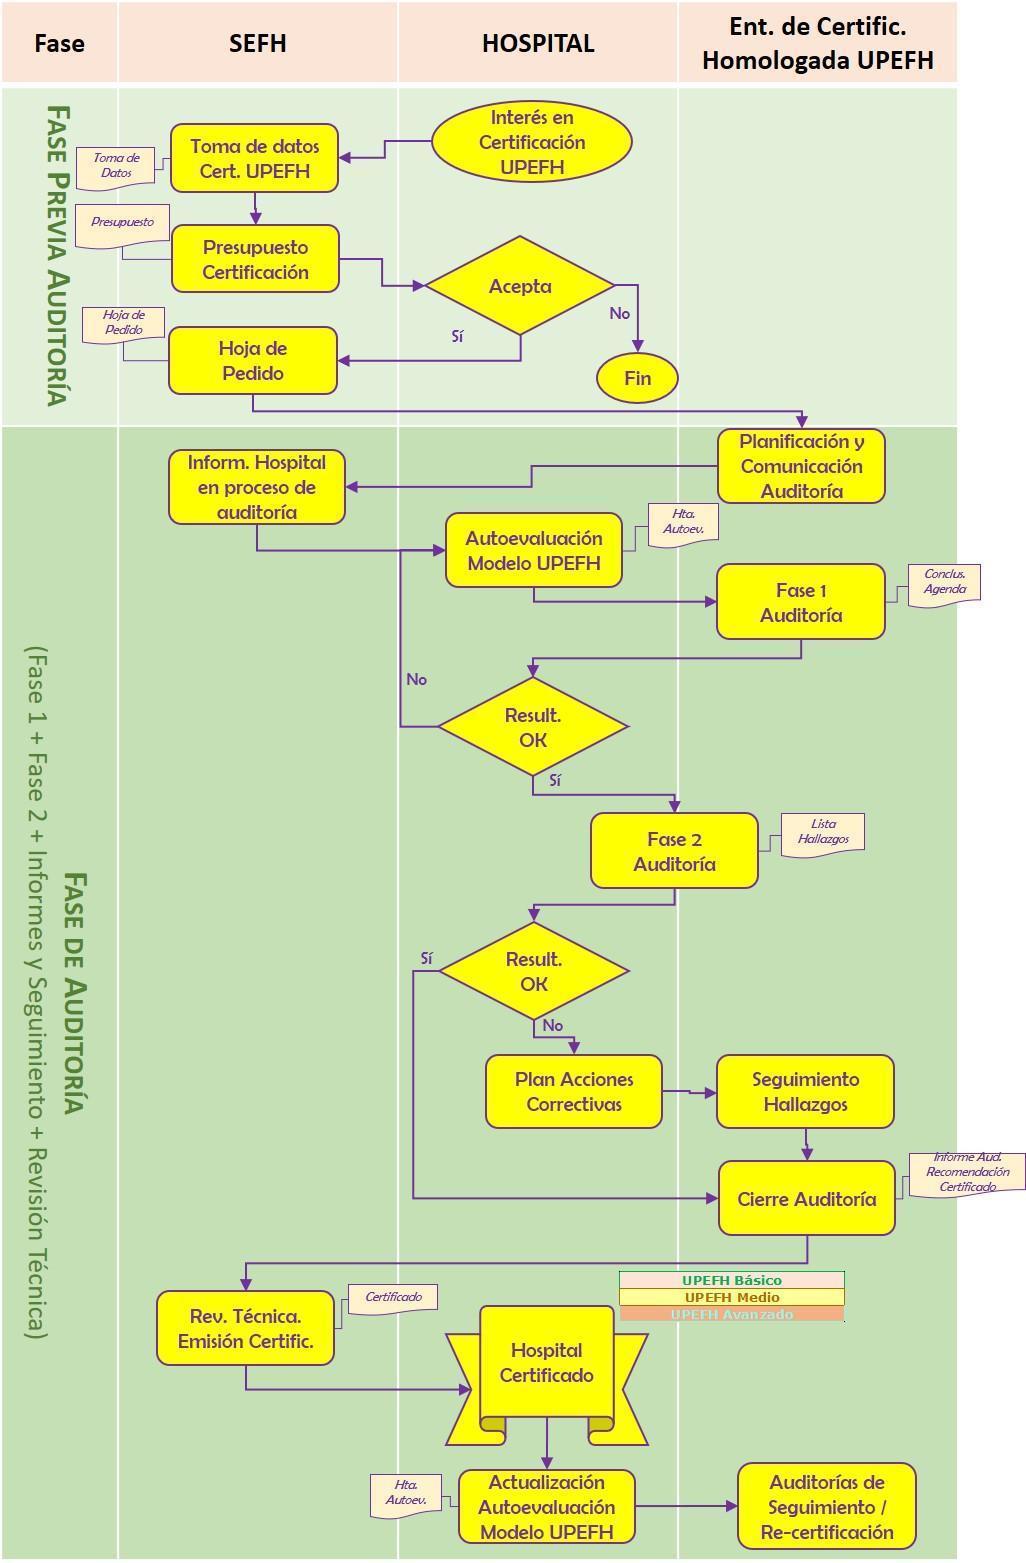


Anexo 1. Sello de calidad y portada del manual de certificación QPEX.
